# Supplementary material for: A four-in-one pure nanomedicine for synergistic multi-target therapy against breast cancer
Source: Royal Society of Chemistry journal article supplement (doi:10.1039/d1tb01820e), 2021-01-01
Supplement: d1tb01820e1.pdf [file d1tb01820e1.pdf]

## Supporting Information

### **A four-in-one pure nanomedicine for synergistic multi-target therapy against breast cancer**

Rui Zhang,<sup>†a</sup> Ge Cheng,<sup>†a</sup> Shengnan Liu,<sup>b</sup> Hongying Lv,<sup>c</sup> and Juan Li<sup>\*a</sup>

<sup>a</sup>School of Public Health, Jilin University, Changchun, 130021, Jilin, China.

<sup>b</sup>China-Japan Union Hospital of Jilin University, Changchun, 130033, Jilin, China.

<sup>c</sup>Chinese Academy of Medical Sciences & Peking Union Medical College Institute of  
Radiation Medicine Chinese Academy of Medical Sciences, Institute of Radiation  
Medicine, Tianjin, 300192, China.

## Supporting data

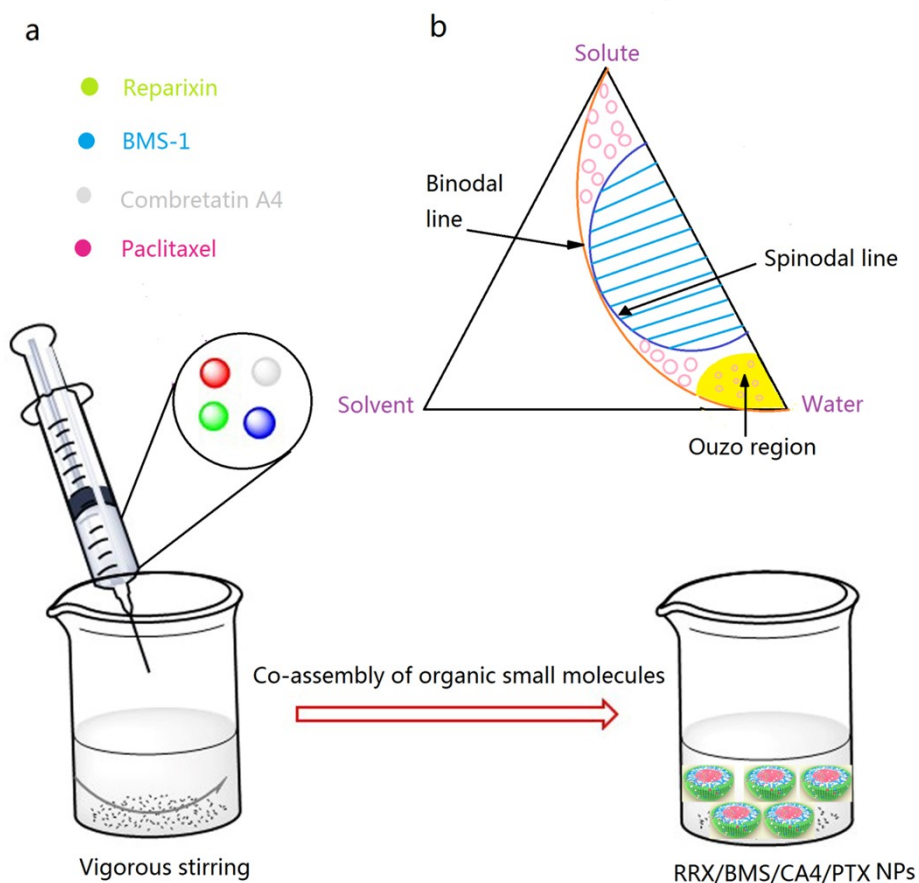

Fig. S1 Schematic illustration of preparation process of RRX/BMS/CA4/PTX NPs (a) and phase diagram of ternary solute/solvent/water (b).

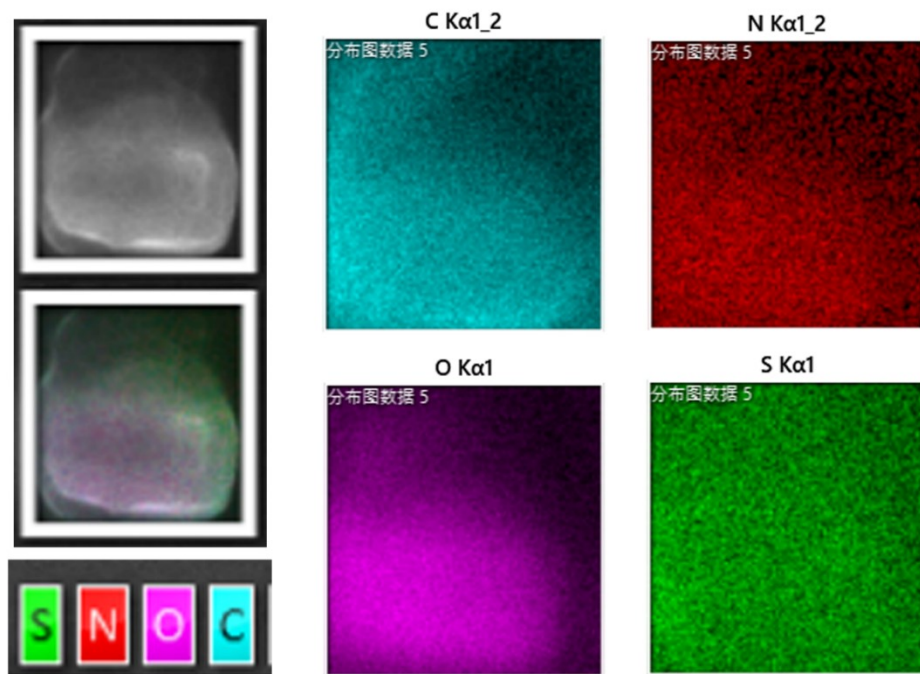

Fig. S2 SEM image and mapping images of RRX/BMS/CA4/PTX NP by SEM.

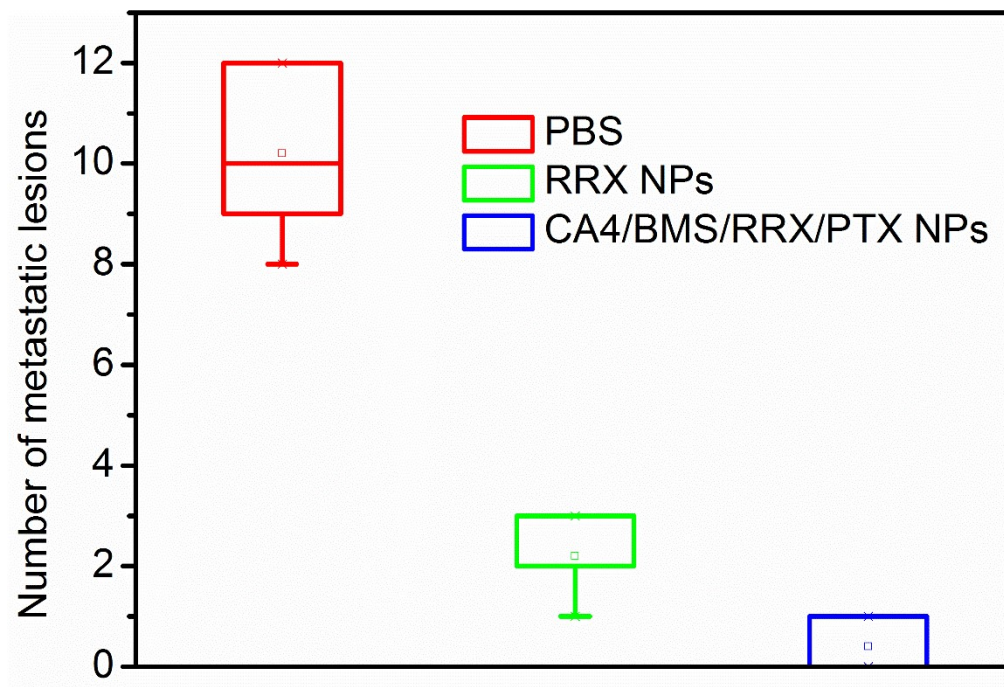

Fig. S3 Number of tumor nodules in the lungs after various treatments with PBS, RRX NPs and RRX/BMS/CA4/PTX NPs.

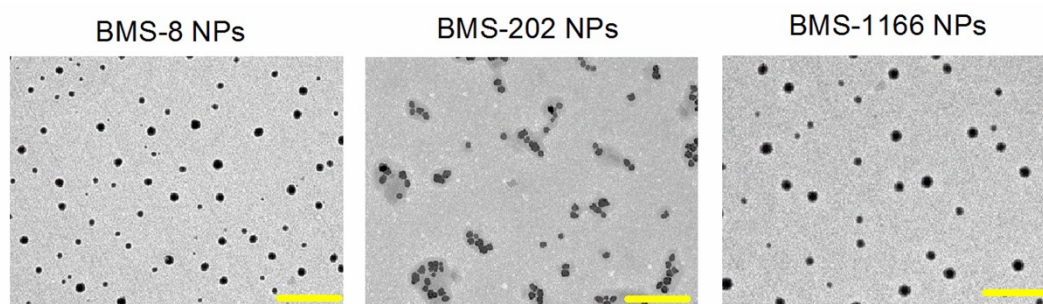

Fig. S4 TEM images of BMS-8, BMS-202 and BMS-1166 NPs ( scale bar = 500 nm).

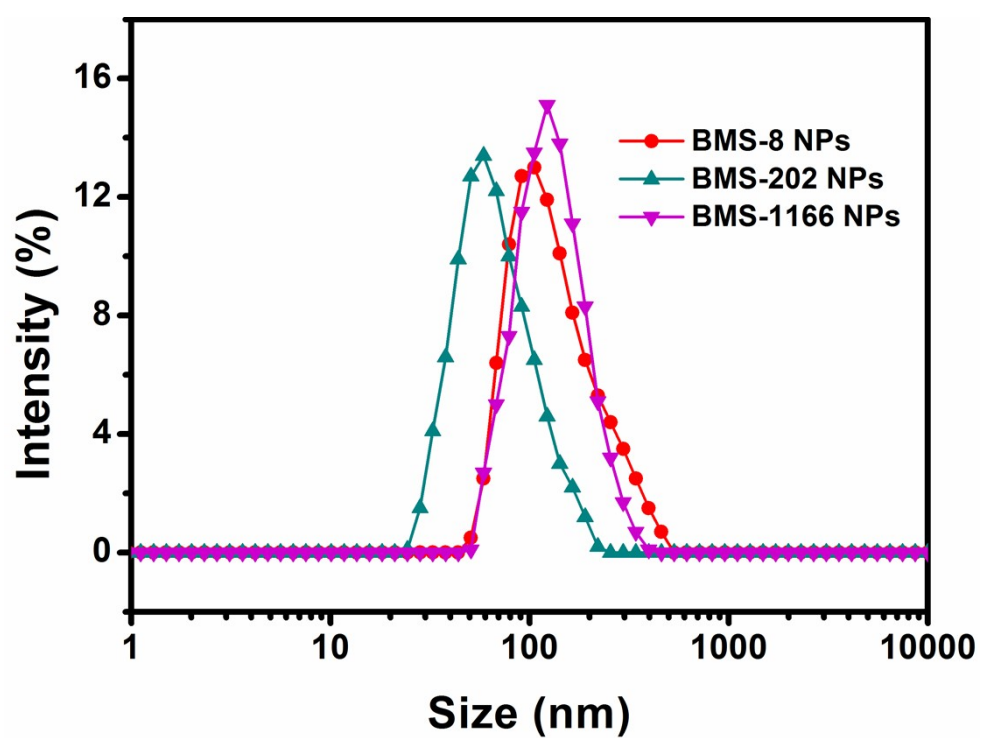

Fig. S5 DLS measurements of size of the BMS-8, BMS-202 and BMS-1166 NPs.

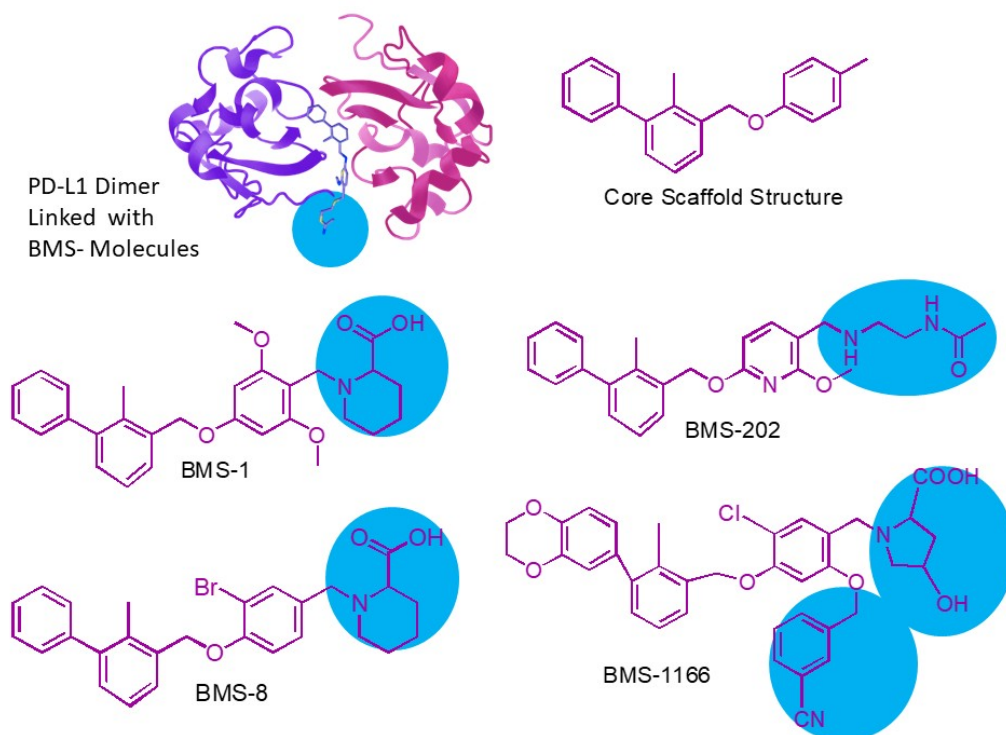

Fig. S6 BMS compounds induce PD-L1 to form dimer due to an identical core scaffold structure [(2-methyl-3-((*p*-tolyl-*oxy*)methyl)-1,1'-biphenyl) found in all BMS compounds. The main structural differences between the BMS molecules are highlighted with blue circles. BMS-202 and BMS-1166 are more flexible and the highlighted areas are more easily affected by components of the TME. BMS-1 and BMS-8 have more rigid structures and are therefore better at forming PD-L1 dimer.
